# Supplementary material for: Exploring the potential biomarkers for prognosis of glioblastoma via weighted gene co-expression network analysis
Source: PeerJ. 2022 Jan 18;10:e12768. doi: 10.7717/peerj.12768 (PMC8781321; doi:10.7717/peerj.12768)
Supplement: Supplemental Information 1 [file peerj-10-12768-s001.xlsx]

## Sheet: TCGA ID
id	futime	fustat	P4HA1	OTUD3	PTPN4	SLC25A29	RASL12	FBXL15	UPF1	THG1L	RPRD2	TIMM23	PFKP	PGAM1	LRRC20	OLFM3	AP3D1	FAM204A	ZFHX4	MSRB2	ZNF180	ADAM19	ESF1	HMGA1	CYBRD1	DDX50	KIN	ZDHHC16	GYPC	IFT20	TRUB1	P4HA2	EGLN1	SEC14L6	FIGN	DARS	HKR1	HSPA14	NAPA	PCGF6	GPR160	FKBP1B	GATAD2B	ZCCHC14	SAR1A	CRADD	TARS	RAB26	DPCD
TCGA-27-2519	316	0	18.3184	1.36659	1.1907	3.96688	13.7464	3.58347	7.86163	4.15678	4.47133	32.045	8.69668	22.0548	8.55653	0.162856	19.0602	1.97696	1.30878	10.7707	1.198	1.06541	11.908	67.4835	21.5894	8.39911	1.25424	7.44644	7.11752	6.72555	5.00717	2.04531	10.3325	0.16958	2.17409	39.9152	3.5076	3.68269	10.2112	2.7263	1.06698	6.34556	8.13884	7.167	10.8891	3.10953	12.3928	3.09447	17.3075
TCGA-06-5858	187	0	58.1524	1.79878	1.22053	4.73009	17.3354	3.23618	12.0611	2.71985	5.70461	43.3802	51.0626	60.1629	11.5584	0.133395	22.056	2.61524	1.44738	12.4656	2.09724	4.54471	10.851	24.6956	13.7971	16.9115	1.92229	11.7824	8.77061	5.42791	6.29984	4.66949	20.05	0.267293	1.97912	37.6729	4.63049	6.59436	18.2763	5.751	1.18565	2.15107	9.29188	7.89635	16.7293	2.72938	19.0207	0.752085	14.8553
TCGA-26-5136	577	1	17.3709	2.14246	1.47534	11.0109	19.4996	3.39859	8.07211	3.69029	6.11625	33.4524	16.0713	20.4129	5.53651	0.177553	12.6521	2.08597	1.44249	12.4405	2.11587	1.90403	10.9432	36.8691	19.9916	9.29281	1.67807	9.21725	17.7475	10.853	3.6314	1.95268	12.318	0.234661	2.57341	50.977	4.94118	4.38981	14.187	3.69896	1.12231	3.492	9.39729	7.16267	11.5947	1.17008	12.7372	3.74769	8.90223
TCGA-06-0141	313	1	18.8283	1.89101	1.38364	4.06809	21.8976	3.88712	6.14612	3.11882	2.70831	32.5721	15.2501	35.8037	3.25658	0.114669	12.5085	2.59291	1.17738	11.6312	1.42407	2.7215	4.43571	37.0344	23.4352	8.99555	1.53174	5.45771	21.2475	9.85388	5.22078	3.75523	10.8564	1.52634	1.15046	23.2214	5.1079	5.03378	12.0488	3.37256	2.50393	3.57992	5.36689	3.68181	14.7188	4.14761	9.74159	1.65294	9.87432
TCGA-27-1831	505	1	30.076	0.912497	1.1731	2.61339	25.3173	3.21207	2.44123	4.83429	2.03126	44.7022	7.64331	28.1611	3.96142	0.192195	3.24903	4.68154	1.17723	13.1425	1.45913	1.8118	3.04528	29.4362	31.6833	12.9199	1.02812	5.03865	7.30853	19.6512	7.48914	1.33434	16.2083	1.87969	1.48484	33.5285	3.17387	5.67491	8.32737	4.06679	1.11454	7.86084	2.12771	1.09984	20.4	5.13822	6.64013	1.68536	13.4741
TCGA-12-3653	442	1	19.4024	1.27502	1.97801	7.3568	11.1723	5.08395	18.7898	3.31704	9.42638	25.2503	10.0482	30.6383	6.22912	0.00715473	27.3199	1.60608	6.0747	7.03391	2.91039	12.0197	5.56519	35.81	27.7307	9.99652	1.18569	7.01307	6.72756	4.87033	3.63412	0.396123	14.768	0.208031	4.71022	29.8772	5.9447	4.16078	23.6261	2.63913	0.316573	2.96456	12.7089	5.47309	13.2724	4.90571	10.6018	2.46232	6.60909
TCGA-06-0125	1448	1	38.7671	1.54342	1.53301	3.75523	45.4692	2.50764	17.1158	2.33487	7.31817	17.2601	60.3961	34.0957	3.62672	0.362609	30.5375	1.19066	1.87433	6.76334	2.45978	2.75624	9.78076	23.3585	49.1505	8.46907	1.26182	3.2942	7.21406	2.48723	3.9556	7.16042	17.6822	2.25841	3.60122	31.2592	5.20758	4.8796	18.1238	2.1074	1.00733	2.48393	8.22245	6.72833	9.76311	2.04338	13.7277	0.914714	6.64708
TCGA-06-0882	165	0	14.6571	1.52781	1.82742	6.62915	11.6331	3.94088	13.303	3.02446	5.7832	28.8834	28.7019	30.2766	4.98696	0.678032	19.7301	2.18643	2.22704	12.7664	2.22008	1.18884	8.40068	70.1501	24.0387	10.1919	1.12493	5.98365	7.3834	4.13335	4.34824	2.68373	14.3629	4.33908	2.5726	31.5008	5.41373	3.39517	10.5518	2.01276	1.21564	7.20243	7.41816	5.31462	12.2287	2.85277	11.0234	2.10584	7.69402
TCGA-06-0747	82	1	12.7952	3.74644	0.952518	22.8194	4.88984	4.06902	21.7691	3.47932	5.8326	19.9227	17.6198	18.0533	4.98815	0.124746	35.5357	1.25864	4.08309	6.26827	2.41639	5.14668	9.58148	44.5164	35.3197	8.71819	1.09222	5.66869	1.84573	8.53212	2.8213	2.11803	9.36811	0.313253	2.92875	29.866	7.25154	3.06045	15.8414	2.07601	0.330341	4.67977	9.53751	9.18442	11.5827	1.97486	10.4584	2.50249	5.45784
TCGA-06-0211	360	1	23.6678	2.234	1.12736	8.40859	10.3903	3.00386	17.4807	3.54447	5.7425	23.2839	18.6858	28.4597	4.52385	0.00446646	31.3	1.44794	2.36647	6.0206	2.85088	10.2065	6.79267	51.0087	19.3307	8.79917	0.842587	7.40296	4.26156	6.18626	2.88587	2.46109	12.4383	0.602111	2.41881	31.636	7.91696	3.2042	20.901	2.49044	1.14084	3.2357	8.27648	5.90669	10.3851	1.9199	14.0841	1.44057	7.02791
TCGA-12-3652	1062	1	36.6361	0.966143	0.838561	6.99371	8.95434	5.31254	7.87991	4.11325	2.968	25.6057	21.0421	47.6301	3.97315	0.0322887	13.6711	2.39676	0.833542	8.81764	2.1134	6.66383	3.90832	30.0138	14.1413	7.19629	0.740248	5.58842	105.757	9.11324	4.3882	1.60323	16.6468	0.697009	1.48021	43.7544	6.28665	3.68535	19.9314	1.72652	0.405872	6.7038	4.35206	2.1644	9.2013	5.6194	6.08822	2.8217	14.1829
TCGA-15-1444	1537	1	14.8867	1.68697	2.05505	8.4289	8.39592	3.37882	13.732	2.18211	7.86646	24.8737	21.4998	25.7331	4.97261	0.154799	19.4307	2.07015	1.9509	19.7502	1.36022	0.594517	8.64218	25.8186	12.1169	9.1579	1.75924	5.52375	7.85579	5.0214	5.42972	1.24476	15.9091	0.337571	1.90383	37.4471	4.15001	6.25835	14.1699	4.62111	0.875627	0.920733	11.1639	8.5689	11.6706	3.74896	13.9418	2.11983	5.38246
TCGA-32-4213	357	0	22.4359	0.725936	0.906967	3.58101	27.571	4.48695	7.65422	2.73001	3.4619	27.0819	15.9641	37.2518	4.93559	0.0115346	13.0702	1.68027	1.05483	10.6594	1.85951	1.75856	4.16442	38.31	19.1413	8.81675	0.763101	5.39271	29.1724	6.10516	4.76745	3.63098	10.527	0.609783	0.899794	24.3862	3.21614	3.59541	13.8152	3.30482	1.03234	3.88516	5.03404	3.23972	9.8498	3.93022	10.5445	0.872911	7.64507
TCGA-02-0055	76	1	63.297	1.14121	0.83421	2.14066	3.89005	6.0376	6.68705	3.90786	3.34972	36.936	37.3767	45.7064	2.25806	0.39428	13.9989	2.52626	1.56674	16.2945	0.620315	6.7082	7.21694	62.3764	49.8495	15.4144	1.61415	8.57963	9.262	9.20724	4.70983	17.8273	9.10917	0.887103	0.92703	22.1065	3.20762	5.2846	12.2996	4.07479	1.12811	6.0354	3.50049	3.42543	19.125	7.03215	16.6594	0.85421	13.8282
TCGA-06-0157	97	1	11.862	1.69232	2.12019	7.82166	7.2713	3.72829	16.5472	2.87443	5.69342	23.0595	10.49	26.0543	5.38245	1.27726	23.0977	1.5264	2.58634	6.28801	3.30035	7.18554	5.48771	24.0251	21.981	7.48101	0.873886	5.83568	5.32878	6.55673	3.65396	1.46921	11.933	0.358427	1.37672	27.0546	8.81784	3.31708	21.2214	2.26638	0.567433	2.0463	9.31172	7.35552	14.4135	1.43998	9.791	3.34968	4.90806
TCGA-06-0750	28	1	18.2274	2.36622	0.649578	5.82139	10.989	5.59474	8.6726	3.21995	4.22475	30.0041	14.2686	25.2993	4.63629	0.0512917	17.1658	1.86794	0.926121	12.041	1.56024	2.48272	4.66693	39.2202	27.9954	10.0791	1.10261	7.42291	15.8809	9.76196	2.6935	3.15203	8.1802	1.77484	2.43687	20.8985	5.94056	3.12384	16.0134	2.39996	0.764311	5.02337	5.177	4.81718	10.467	3.91577	10.0205	1.76438	10.8899
TCGA-12-0821	323	1	32.8901	1.32306	1.74001	2.87448	76.7964	3.62704	13.9111	3.48836	6.22059	35.02	16.4541	29.9705	5.2399	0.23819	19.9498	2.54326	1.22525	12.1988	2.98812	4.18745	6.80022	33.5598	21.3956	11.6709	1.68623	6.57806	13.8461	9.02333	4.72168	2.89834	16.0971	0.175562	3.55878	47.9758	6.26904	5.22958	18.2523	3.55213	0.409958	2.43674	10.358	6.60502	15.0135	4.3461	16.0062	2.04687	13.6859
TCGA-41-5651	351	0	18.8082	2.67046	1.5385	8.266	7.73036	3.15999	19.0929	3.24426	8.17039	24.2889	32.213	32.2353	8.92539	0.960816	32.1948	1.54285	1.91417	11.3158	1.84251	1.50058	10.7225	87.328	5.22262	10.1704	2.2968	6.17664	7.56694	5.67666	4.75023	1.85763	15.4492	0.430582	2.16374	24.4033	7.56082	8.07178	9.74676	2.56738	0.34428	4.26604	15.3269	6.14013	10.1755	2.70937	14.3472	5.93996	5.90773
TCGA-27-1830	154	1	27.9582	2.57073	1.28405	9.11168	29.1822	2.36634	12.2545	3.17595	6.15128	24.7282	16.026	17.1367	4.45312	0.0981155	20.663	1.62989	1.38093	9.95668	2.18868	2.66914	7.66595	52.5951	23.9811	10.1385	1.04757	6.85214	9.80237	7.51033	3.63388	5.42701	12.2965	0.706719	3.80922	26.9894	7.99342	3.74303	13.2242	2.86165	1.19386	2.41302	9.74932	8.6899	13.4996	2.55106	16.0541	0.592244	8.23122
TCGA-06-0749	82	1	8.76552	1.28848	1.37231	7.57718	87.3227	10.8656	9.48786	2.53268	4.04349	32.6229	36.5258	35.3044	5.19948	1.18051	13.9351	2.14612	0.731414	18.4127	1.56447	0.467347	4.45118	38.5786	18.291	8.8788	1.09968	7.31436	19.6824	8.83842	3.07784	2.02557	12.0971	1.52184	1.95907	26.7254	4.60407	3.12421	21.6634	1.61031	0.827097	7.50141	5.59493	2.49766	9.33579	3.91079	7.92396	8.72633	13.2813
TCGA-76-4928	94	1	23.5499	1.49256	0.790477	4.17924	41.5003	3.24809	10.9162	3.59137	4.90595	27.5285	18.8377	25.9751	2.8634	0.388954	18.7697	1.6441	1.39887	10.0687	1.69898	10.6014	5.11499	82.0158	15.1913	10.4614	0.966222	8.48143	11.5484	7.12638	3.19312	3.74194	11.156	4.44708	1.47092	26.8139	4.73192	3.1889	11.6662	2.3104	0.642052	7.04291	6.12854	3.00504	9.24083	2.6429	13.7916	0.952079	9.22071
TCGA-06-0210	225	1	22.3743	1.53443	1.07493	5.52781	36.0279	3.24803	13.4511	2.60363	6.53351	19.6692	17.9404	28.0567	5.40524	0.0343139	21.6677	1.25092	2.33264	9.82984	1.93774	2.77298	6.58892	65.6599	20.6032	10.1215	1.07887	7.29664	21.4231	4.68947	2.84077	3.57342	13.0776	0.464843	2.01338	27.746	4.18849	3.13293	13.0968	2.00896	1.75982	2.33908	8.48549	2.88039	10.571	2.33837	13.4244	1.0279	7.00648
TCGA-06-0745	239	1	26.2947	0.657182	0.98873	4.19946	11.7321	5.55679	9.73615	2.75668	3.59314	34.9221	15.0887	35.3278	8.54343	0.011904	16.9117	1.9082	0.734813	15.7254	0.777298	1.83797	6.80901	99.0107	9.19673	8.51764	1.09424	10.4085	22.7049	10.628	2.959	2.07764	13.0189	0.335634	1.25068	31.633	5.31213	4.41207	9.02987	2.27378	0.845936	8.00858	6.28952	5.94799	10.42	8.34933	11.52	3.36754	13.1292
TCGA-32-2615	485	1	24.4271	2.34021	1.03283	7.65691	26.6571	3.72671	11.4864	4.03165	5.74399	21.7254	24.6541	26.3409	5.4406	0.218624	21.3728	1.87425	2.38622	8.10291	2.01676	2.78542	6.27153	84.2217	41.6145	9.47874	1.18081	6.69796	5.12337	8.75981	2.67397	4.04079	11.3203	0.856688	0.105499	26.0189	6.96568	3.50815	13.5578	2.63874	0.76369	2.17367	8.41794	6.32175	11.1762	2.02266	11.1323	1.63791	11.2796
TCGA-28-5215	335	1	18.587	1.58396	1.26452	3.62607	15.5018	2.72955	14.4498	2.89022	6.29692	27.8318	14.5335	28.7604	7.69256	0.0531324	22.4872	1.58265	1.82209	9.84177	2.13428	2.22168	8.50158	62.0523	13.6905	9.63817	0.919796	6.8873	12.4323	5.58338	4.95624	2.60949	11.316	0.942979	1.51963	21.4516	4.31308	4.75664	15.7521	3.40535	0.854885	2.8407	8.66158	9.05021	14.1125	3.15924	13.7169	1.49075	7.12042
TCGA-28-5220	319	0	15.5132	0.668555	2.91474	2.10569	145.99	5.4319	9.65565	5.0594	4.20067	38.5177	9.76061	29.6196	7.99231	0.109368	17.402	3.35674	1.05983	14.6294	2.52543	1.49559	6.91595	10.8606	47.7372	12.7906	1.33509	4.19949	20.0453	9.87584	7.41431	1.05638	13.9454	0.151116	1.70812	49.0919	4.8143	6.08732	27.958	3.82099	1.43476	3.34892	5.00681	6.03448	11.2979	9.97044	13.1777	1.28092	18.0962
TCGA-32-1970	468	1	9.69218	2.05889	1.61011	7.66204	65.9844	3.93707	25.2909	2.76114	7.40497	20.2178	16.3646	23.3473	5.45932	0.550641	37.7702	1.44869	2.26573	6.53486	2.37495	9.65065	6.54391	28.1117	22.8557	9.78376	1.14319	6.31397	4.9944	5.6594	3.46241	1.25243	12.4222	0.641406	2.80276	23.2441	10.258	3.88174	13.7434	2.3938	0.366024	2.03334	12.5692	8.99632	11.4069	3.12132	11.5282	1.65642	6.50239
TCGA-06-5410	108	1	38.9915	0.790339	0.696404	3.17062	7.07237	6.69992	10.1664	2.90939	3.53458	33.0855	13.1099	36.7152	4.28444	0.292325	15.916	1.92211	0.777825	18.8831	1.12558	2.22976	6.2225	43.7216	21.4045	12.1242	1.27309	7.54863	18.2502	7.15618	3.98842	5.27407	9.91627	1.64459	0.710726	26.3699	2.81019	4.28215	13.1175	3.11761	4.82658	2.87236	3.34152	2.17113	11.895	2.64646	10.8121	0.98939	8.44235
TCGA-27-2521	316	0	27.153	1.03303	1.61355	9.11315	23.7289	6.44444	13.5969	3.65892	5.44052	53.0435	33.6528	41.857	13.1685	0.0394214	25.588	2.42413	0.80738	20.6793	1.11667	1.2005	3.60852	105.252	11.4342	18.0242	4.16596	13.4098	11.8411	7.59405	5.97648	1.43888	12.1493	1.42988	1.62746	43.9002	5.0733	9.57358	11.2995	4.4638	0.427257	4.83587	10.0229	5.19204	18.1963	3.99062	17.7852	1.90206	9.14376
TCGA-14-0787	68	1	20.9664	2.04473	0.910574	4.60005	4.05761	4.42324	8.23843	4.53526	4.86118	30.5311	20.242	24.8892	6.30958	0.185933	19.2776	1.52965	2.74179	8.77406	2.61406	4.18066	9.10254	124.339	26.9192	11.1592	1.05227	11.5146	3.64061	9.04052	2.34251	1.69021	12.8776	0.255565	1.92496	31.8629	7.12839	3.61233	13.7957	2.36057	0.927397	8.09181	8.19937	2.70702	12.89	4.28074	13.3237	1.12567	8.57794
TCGA-06-0878	218	0	33.771	2.27687	1.4921	3.67948	15.8661	1.70258	11.7094	3.98976	6.31044	25.7589	20.0747	29.5006	5.20031	0.059087	20.6701	1.94018	2.74675	8.17552	2.39061	9.66163	7.63252	51.0157	31.5329	10.0038	1.32237	6.05275	10.5127	6.23843	4.53615	3.19347	12.7673	0.455535	3.34372	36.3609	6.01876	4.01344	7.86329	3.14255	1.04972	3.52761	9.5876	7.06126	12.33	2.99412	14.2527	1.43729	7.19522
TCGA-41-2572	406	1	16.7637	2.25784	0.941739	9.66228	20.8952	4.53473	13.2179	2.1713	3.52786	27.7469	16.8888	29.1677	5.15222	0.0381714	24.6706	1.20131	1.47889	9.39958	2.91329	8.39302	5.56422	29.1105	13.6069	6.76535	1.03585	5.46423	25.2227	6.74217	3.12959	2.55617	10.1553	0.78556	2.7859	21.8151	8.06384	3.30311	22.6249	1.97402	0.520946	3.5277	6.18507	4.08537	9.42273	3.31017	13.1251	2.1518	9.06411
TCGA-26-5134	167	0	13.9976	3.72989	1.94234	6.0155	17.1503	4.12221	12.2723	3.62638	7.37043	30.3574	17.7194	18.0485	4.03892	0.100181	21.0223	1.86009	2.57094	8.75465	3.11741	1.56234	5.89321	65.8519	11.3667	8.00796	1.27306	7.44145	13.4928	8.35042	3.09303	1.55304	12.0547	0.979787	3.06275	24.4137	7.34493	3.57948	15.4601	3.02503	0.463419	2.94588	12.7203	12.1182	9.97741	2.26867	13.7609	10.8307	6.22171
TCGA-12-0618	395	1	32.6073	2.90714	1.89344	12.7102	17.0035	4.4792	12.9079	3.06809	6.34713	20.8931	30.9342	39.0594	7.86311	1.16126	22.6787	1.49413	1.88603	8.05478	2.04753	1.69048	6.64066	59.2375	5.95835	9.06933	1.22759	6.10667	3.84751	9.99891	6.24558	7.20839	18.2077	0.136762	2.64926	35.7837	7.40158	3.97616	16.4074	1.86739	0.385404	6.35206	14.0015	6.80277	9.88285	1.64741	16.9379	3.28019	6.48049
TCGA-02-2485	470	0	9.59712	1.45174	2.33829	9.53967	57.0885	2.57757	20.2483	5.11998	6.98604	23.8572	12.4166	23.2588	8.0716	0.359706	26.9658	1.64313	2.38595	5.63537	4.57364	5.46698	7.03306	31.2297	21.8943	9.40305	1.3827	5.2321	2.70296	8.67917	3.59426	1.82681	10.7068	0.287743	1.59849	28.8562	10.1038	4.87511	24.7755	2.50913	0.228457	3.47939	11.2587	6.81903	11.4069	2.07912	18.1789	1.33038	3.86567
TCGA-26-5133	452	0	13.04	2.36324	1.33725	4.9962	2.19333	5.23294	17.7655	2.18908	6.60476	31.7436	15.2043	55.2235	6.05228	0.0294815	34.0134	1.63983	1.25114	7.94369	2.40862	0.566131	10.1576	189.152	15.0525	9.94189	1.08143	12.1016	4.69497	2.66215	5.10165	1.68148	7.06158	0.0844219	1.94088	39.1328	5.88688	3.93187	27.9354	2.74818	0.400233	1.40546	10.843	8.76932	9.12136	2.94148	14.9201	0.920769	7.3981
TCGA-14-0789	342	1	36.4494	1.83023	1.12432	4.52586	3.64864	2.6481	18.222	3.5541	6.92396	17.3567	25.7734	26.4813	1.2137	0.00567288	28.684	1.25989	4.26534	6.74208	3.53585	3.23506	7.892	64.2947	26.3749	9.22035	0.720882	5.12266	14.4101	3.38877	2.92381	3.18567	17.2122	3.44885	2.79077	29.1442	6.02335	2.33835	15.1309	1.69349	1.24933	2.97232	7.01255	3.96099	9.38693	1.32035	10.8833	0.255542	6.38009
TCGA-06-0139	362	1	38.1458	0.850235	0.825848	3.60018	6.29344	6.88715	6.74229	3.48081	2.73642	35.5874	11.8046	37.8844	1.97883	0.0333354	10.6248	2.64196	0.604934	19.8092	0.984203	2.18228	2.67194	47.2668	22.246	9.79815	1.36472	7.88968	28.6485	12.8742	4.54428	4.78104	7.59041	1.10143	0.706478	17.9264	3.30919	6.04842	11.4405	3.25994	5.89993	4.27743	3.14753	3.00301	15.0761	3.25027	8.07586	0.45049	7.69829
TCGA-06-2558	380	1	25.0286	1.77886	2.24345	6.64547	18.313	3.94026	10.007	3.53342	5.88803	33.6487	21.433	35.5949	6.56606	1.13193	16.9242	2.46523	1.08213	10.5016	2.23128	1.92581	5.87278	34.4996	11.5843	10.6591	1.31996	6.66097	6.74515	9.91443	7.04585	2.00734	14.9593	0.945899	1.32293	30.1079	5.7749	6.67355	16.0366	2.8825	1.06171	3.97572	9.21712	8.81573	13.4313	2.70338	14.5573	2.26821	8.59613
TCGA-26-5132	286	0	18.1014	2.56629	0.934526	10.2455	17.2201	4.39459	14.3943	4.21139	6.22211	26.8395	44.3919	41.1153	7.38315	0.0703467	22.5545	1.76392	1.4555	10.1945	2.40441	2.32512	6.19092	60.7148	19.0868	11.2463	1.05674	6.18161	4.88319	6.41088	3.19364	5.58373	15.3204	0.37809	0.228387	43.358	6.68119	4.17606	29.9143	3.43566	0.514053	1.4292	12.5196	7.78098	10.351	2.59608	19.013	3.57447	8.70097
TCGA-06-0129	1024	1	9.44959	3.49224	2.7352	15.5278	8.14108	3.56063	15.338	4.5703	9.51168	33.9764	15.5973	20.8963	6.79702	0.195548	23.9715	2.17469	0.74194	9.09872	3.33808	1.14033	9.34337	102.189	8.01067	13.2961	2.70894	8.12007	8.51476	10.3172	6.18451	0.598915	11.8818	0.423408	5.9828	24.2419	8.654	8.57106	15.0966	4.6612	1.64428	1.67945	14.3045	16.2744	14.6863	3.03159	15.328	5.83248	4.45128
TCGA-06-5411	254	1	12.0459	1.2554	2.25939	4.50324	13.7165	8.87399	7.33101	2.80421	3.99691	43.2565	38.9819	54.0605	9.07931	3.80191	16.2444	3.97513	0.556308	16.3517	1.77242	1.91414	3.81559	49.8781	8.69157	12.0276	1.43644	7.441	8.46542	11.6616	9.48108	1.86645	10.9801	1.30213	0.48367	22.3665	4.32449	7.2082	20.4543	3.29887	1.43821	14.337	5.29674	6.18643	13.5596	4.61489	10.6522	7.68799	15.3529
TCGA-28-5209	442	0	26.7798	1.56478	1.35719	4.223	22.9829	1.632	20.0304	3.92512	7.36775	24.4564	16.3538	34.0563	6.23125	0.0125861	36.7039	1.39512	3.68436	4.39951	4.55353	18.7444	7.77814	41.4226	18.4046	10.8921	0.9316	5.57882	5.73751	3.8933	4.0948	2.01308	15.0437	1.13113	4.2016	33.2441	8.94308	4.05591	19.1815	2.91511	0.708776	1.2561	10.6338	7.84128	9.71405	2.3224	20.6597	1.8445	6.66706
TCGA-27-1837	427	1	9.62532	2.29972	1.23863	8.34793	18.4039	2.42301	13.9594	3.0919	5.39824	22.5829	19.3879	25.5576	5.69291	0.183271	22.2403	1.23576	3.09628	8.97351	2.22299	5.18177	5.98111	50.9259	8.66499	8.02504	0.960381	7.58391	14.0726	5.94574	2.97951	1.38134	9.46638	0.883386	2.12919	20.4203	6.36748	3.39051	15.8092	2.73739	0.748038	5.10099	8.88652	6.63798	9.12212	1.79711	13.8785	3.22457	5.96386
TCGA-12-5299	98	1	42.8781	0.854119	1.04708	4.70879	10.0831	3.21889	11.3157	4.89174	4.66613	27.3059	18.8668	64.3861	6.06191	0.127692	18.3156	1.84929	1.38668	10.4028	1.88018	3.68886	5.31124	154.663	31.2272	10.4471	0.866094	14.2424	8.54375	7.90823	4.36392	2.53466	14.5948	1.56786	1.84065	36.9732	4.17104	4.03582	15.49	2.61476	1.15153	4.67979	6.02771	4.54026	10.7366	2.9409	14.1901	1.35822	11.3181
TCGA-76-4932	1458	1	27.642	0.731921	1.20892	5.05934	13.4396	3.82779	12.3206	3.0092	7.02457	21.9061	22.8854	37.8317	6.47917	0.0394579	20.5776	1.23282	1.47092	7.68169	2.28062	5.2325	6.41701	107.039	23.4288	8.4108	0.689225	6.50677	3.03121	5.78608	2.69081	1.60435	23.0442	0.973449	1.59141	38.2756	4.13935	2.93307	12.9189	1.69992	0.674545	3.19955	10.6656	5.21014	9.37805	2.82681	12.4945	2.25931	6.15487
TCGA-06-2564	181	0	31.0245	2.09712	1.74823	8.65844	9.50294	2.56362	12.908	3.01546	6.22494	22.6456	17.634	26.8601	4.9914	0.129122	22.4741	1.63376	3.2615	7.18879	2.48292	7.81421	8.62798	34.8738	17.9439	11.0635	1.3096	7.0614	8.29384	6.59648	4.6565	3.34052	15.5293	0.792708	3.46708	31.2932	6.10238	3.94537	12.2928	2.50112	1.30265	3.25129	11.3264	7.71416	12.0694	2.11356	14.1596	1.15578	5.39095
TCGA-26-1442	953	0	17.016	3.10941	1.5415	13.7671	18.0847	4.43127	12.2713	2.34705	6.93786	29.7213	29.3513	36.7057	10.7741	0.840884	17.4703	1.88862	2.58329	17.1343	1.28452	2.6583	9.49566	22.4772	11.4462	11.0208	1.80864	8.00188	2.9125	7.47516	5.39527	1.16816	13.5508	1.02586	2.21667	36.3914	6.40348	4.35595	15.9259	3.18357	0.540696	2.82065	9.64097	6.69514	16.0841	3.07285	12.1108	1.82837	10.4859
TCGA-41-4097	6	1	37.7191	2.57681	1.86287	6.86121	18.4736	6.63069	14.9269	2.4047	5.33082	26.4933	35.2945	36.99	4.65891	0.578006	22.8609	1.54677	2.69343	8.58683	1.81646	5.5952	6.08557	35.8559	27.9345	9.56894	1.04229	6.95266	13.2395	7.03784	4.66456	10.5058	16.2809	2.43554	2.25063	25.647	7.66456	3.40407	12.9008	2.47331	1.38816	4.43546	6.00889	5.23892	11.2565	2.77328	12.5767	3.32048	10.132
TCGA-28-2514	160	0	18.5496	2.73406	2.46542	5.81145	20.5042	3.59793	17.2678	2.70174	7.11114	23.4835	41.013	44.6455	3.96904	1.35665	36.0511	1.56746	5.24335	7.69261	2.50607	4.30487	6.98307	40.1005	17.5529	10.2287	1.06982	4.75752	9.90188	5.8004	4.70059	2.0951	17.5556	1.67114	4.28015	30.5924	7.89698	4.38747	17.5553	2.71169	0.684334	4.10782	11.5309	8.19787	11.5862	2.98273	16.7944	5.20538	6.16362
TCGA-06-0171	399	1	38.8642	1.21264	1.24679	4.74282	6.66961	4.50272	15.1516	2.32608	7.31749	19.6047	16.9457	25.5422	2.6891	0.167894	21.6661	1.41186	1.71325	13.9025	1.9728	3.37418	9.09328	38.6326	39.5778	10.4678	1.31166	4.80714	22.7576	3.59533	3.92544	4.3854	12.4778	2.07824	1.5012	22.4968	3.85608	3.29968	14.8114	2.45192	3.06375	2.25504	6.33121	5.50734	10.6738	1.81603	10.8387	0.398441	4.34903
TCGA-06-2562	86	0	21.6818	2.68788	1.33799	7.40831	5.84931	3.01933	10.1979	3.74535	4.14733	28.9439	25.261	32.3735	4.74493	0.3925	19.8832	1.83909	1.65983	8.76764	2.02128	6.41567	11.8709	102.489	13.8157	10.1276	1.27682	7.49585	5.67747	7.48058	4.10125	3.40438	14.5183	5.34481	1.09969	32.9607	7.26265	4.34558	12.7075	2.72384	1.03332	4.98684	6.64129	5.27036	12.3702	1.98353	13.9376	1.34293	8.91861
TCGA-28-2513	222	0	19.2687	1.32849	0.816852	6.13987	18.9083	3.96856	16.8501	2.636	3.12043	23.956	9.45519	26.2023	3.87103	0.0356277	25.0958	1.78823	0.731623	10.4634	2.26596	2.13836	7.58439	29.0238	21.6488	8.18769	0.720117	5.01856	18.4113	6.61107	4.25166	4.93537	10.3548	6.41729	1.8888	26.6369	5.72405	3.36714	17.2251	2.68076	1.27955	4.01373	3.91167	3.58465	7.98299	3.38307	10.2593	0.687812	9.8679
TCGA-06-1804	414	1	9.85523	2.82239	2.88032	13.606	113.763	5.43585	16.8516	3.40463	6.8742	25.9136	17.4562	36.3687	7.09171	0.383431	29.1539	1.54263	3.93257	9.00973	2.4997	4.06576	6.98401	18.4918	15.4313	10.8124	1.01579	8.74911	2.62156	10.0793	2.43977	3.18319	15.9944	0.546172	5.11577	28.0254	9.80014	4.17422	33.354	1.94427	0.484119	1.08194	12.2134	12.0642	7.44739	2.93455	11.2898	6.93188	6.64801
TCGA-06-0645	175	1	24.5375	1.50052	0.70803	8.08989	12.7095	6.31213	13.9453	3.87217	4.43346	26.003	20.8631	30.7231	4.26206	0.111622	21.6331	1.69378	0.688492	10.4657	1.90934	3.23957	6.17206	44.3973	14.123	9.97585	1.16071	6.74006	16.1039	6.403	3.0398	2.65593	11.4138	0.657714	1.89795	20.4034	5.52878	3.69573	17.2293	2.80077	3.08215	4.14019	7.27998	4.30828	9.99685	2.07721	13.9037	1.35761	7.34245
TCGA-32-1980	36	1	16.4475	1.64799	2.13942	4.28128	10.0888	6.90128	11.4804	2.60215	5.71691	35.4918	50.1262	49.3386	8.69538	3.86714	19.1427	2.67805	1.06572	16.2846	1.28884	1.93439	5.60159	43.8176	16.7739	9.96751	1.131	7.81012	13.6178	5.87924	5.66751	2.72193	11.9507	2.60548	0.955152	19.9846	4.4813	3.94608	20.7391	2.58821	1.92875	8.25593	6.15729	3.7524	12.113	2.72934	7.71408	7.59345	13.3309
TCGA-12-0616	448	1	10.5846	1.585	0.761223	4.10589	13.2739	4.02186	8.78779	5.3193	4.74751	28.8701	7.38386	27.2962	5.49885	1.24412	12.0252	2.47659	0.614307	9.61759	1.52488	1.8206	5.31565	137.44	9.5895	10.5063	1.19587	7.37671	11.5233	12.2109	3.55591	1.56432	10.0755	0.525388	1.56679	22.6756	5.88752	4.4318	15.9161	2.84175	0.799514	6.19898	8.73379	5.37681	10.7637	4.86234	14.4118	1.72439	9.70087
TCGA-06-2563	259	0	12.5133	2.11546	1.71279	11.586	6.00963	2.65969	15.009	4.60115	6.08754	39.2922	16.3843	50.8313	4.26714	0.383383	28.7877	2.02376	2.40205	5.78882	3.72982	38.4991	9.38286	25.991	14.7448	9.205	1.31603	12.8499	5.40875	7.96207	4.91182	0.716493	11.7987	0.987734	2.87758	28.2923	9.8706	4.72324	23.9951	3.04731	0.639302	6.03247	10.5782	5.82608	12.2435	2.90009	13.644	2.45715	6.69896
TCGA-06-0219	22	1	21.1109	0.644136	1.20963	1.76086	24.4778	4.60598	3.29956	4.4807	1.98539	52.31	17.5986	56.7179	4.10034	0.772987	4.9589	4.51038	1.62968	15.1668	1.18472	0.670465	1.79587	26.4492	18.1227	9.26179	1.27378	7.39932	22.3389	16.3913	4.79343	1.25352	8.09676	0.771027	1.17499	28.4402	4.03633	8.68969	13.7955	3.54481	1.16843	8.8503	3.14179	1.55716	15.5908	9.18462	7.76791	5.80774	17.2021
TCGA-41-3915	360	1	51.1771	2.05358	1.07385	13.019	27.7908	5.54768	12.4032	3.15249	5.48861	25.6759	28.3541	40.8289	7.30769	0.102924	19.5998	2.28441	1.19903	10.9387	2.03152	1.87428	4.86121	50.7844	33.8014	11.9577	1.02317	7.96265	12.4825	9.68087	4.94446	5.99533	13.4943	0.42409	2.86924	26.3168	5.47508	4.41096	16.4459	3.54204	1.40032	3.93289	8.03945	5.83971	13.512	2.91983	11.0504	0.883635	14.4556
TCGA-28-5207	343	1	9.66655	1.25612	2.55701	4.85378	86.5836	4.85125	11.9932	4.67803	9.62086	29.614	14.8201	27.6249	9.1783	1.59108	20.2742	2.42635	1.77085	11.5942	3.10645	1.73636	6.38449	17.8529	32.4702	12.6048	1.48172	5.75267	7.97109	7.97989	6.46763	1.94864	15.5301	0.866665	2.81018	36.2267	5.38473	4.85759	22.5817	3.59315	0.608309	5.16378	13.1557	11.1013	14.2717	5.14822	13.6819	4.69877	8.11794
TCGA-28-1747	77	1	7.48963	1.39803	1.33271	6.36828	86.8875	2.64676	12.0195	4.21686	5.55356	26.526	16.0299	25.2369	6.52445	0.376838	20.1645	2.0684	1.6773	7.99608	2.30906	2.95485	5.8571	36.8891	18.0246	8.06402	1.01204	5.87957	13.3073	6.30175	3.30156	1.01338	10.9262	0.50427	2.86744	29.0925	6.27385	3.22147	23.6667	2.64267	1.07054	2.27918	9.01387	6.46657	9.99655	2.2569	12.4974	3.73453	6.17041
TCGA-19-4065	214	0	63.0029	2.06679	1.73776	2.68851	8.89173	5.6753	8.73625	3.20269	4.60072	49.5707	57.0909	47.9057	5.65827	0.702332	16.3617	2.08285	0.977375	19.58	1.30702	10.3002	6.32821	67.7997	15.6439	14.5013	1.45014	11.9786	11.6541	6.49046	5.16376	27.112	7.90773	1.917	0.637974	25.5894	3.50327	4.26194	12.0076	4.22608	0.450375	4.47605	5.59254	4.26365	16.79	1.71811	14.4642	1.90741	12.0851
TCGA-15-0742	419	1	14.3145	2.21097	1.1675	12.5	6.8399	4.46262	13.5263	4.1692	5.17038	24.5982	21.5398	28.3477	7.60007	0.0705799	23.1683	1.46427	2.89442	8.38165	2.30118	2.81042	8.92503	81.9628	13.0251	8.71454	1.07324	9.17832	2.4957	6.68846	2.3222	1.21218	15.9434	0.373125	1.88453	23.0286	7.88185	3.67297	12.8002	2.75914	0.273764	5.70071	9.57765	6.47133	10.3491	4.09624	11.7628	2.18922	9.7875
TCGA-19-2624	5	1	10.9559	4.65147	1.6984	20.0747	10.7842	2.51105	11.0973	3.35712	6.43466	28.0396	27.1398	18.3858	5.94425	0.381157	23.0808	1.45397	2.05699	5.59232	3.19268	3.66782	8.57942	39.2968	5.76849	7.95766	1.61627	7.66095	2.92934	10.4285	3.72618	2.21289	10.8142	0.556778	3.18772	20.3973	12.1109	4.14012	16.2492	3.10446	0.217872	6.40309	11.3192	12.649	9.77633	1.30398	13.026	6.4341	5.33944
TCGA-02-0047	448	1	36.448	1.98595	1.88703	5.6202	52.0958	5.12551	10.5473	2.73628	5.73276	36.3546	24.8979	52.4288	9.16925	0.463742	20.1972	2.4934	1.17223	12.3988	1.51612	3.24788	6.04884	46.1486	17.9883	12.7976	1.28014	9.12626	7.89356	5.3303	6.74923	4.69838	15.0745	1.65629	2.08859	33.8933	3.83113	4.74133	14.3436	3.81708	1.15475	3.43865	7.59892	8.76446	19.0221	3.24706	12.3747	1.30313	15.9762
TCGA-27-1835	648	1	11.9932	2.48615	1.52412	6.68492	8.40588	1.85072	14.3544	4.11986	6.08854	24.2848	15.0389	20.3628	6.37572	0.11689	21.0385	1.80891	5.3342	6.92187	3.55201	27.6014	12.0577	20.4449	11.3922	6.87449	1.28954	7.95679	3.18165	11.6747	2.72659	0.687714	12.3721	1.15458	2.57712	35.2273	9.36179	3.56055	16.8248	2.46984	0.154665	4.42397	13.3068	7.65446	10.5549	2.01883	12.8156	3.97958	6.6301
TCGA-14-0781	29	1	26.4487	1.31015	0.836082	4.95481	8.85827	3.07983	9.01848	2.43283	3.70029	23.3024	21.6217	36.5864	2.38506	0.0566121	16.7582	1.23589	1.22741	11.3291	1.52463	2.66618	7.29179	78.8606	13.314	9.09454	0.894923	7.01405	9.14863	5.40564	3.20441	4.42589	14.4928	4.17001	1.04662	37.1521	4.2375	2.53546	9.50145	1.92311	1.27902	5.34724	4.2853	3.013	9.54382	2.61152	9.77649	1.02006	11.2764
TCGA-06-0649	64	1	19.8347	1.53996	1.21951	4.23198	19.0243	5.30491	12.6021	2.26923	5.06785	19.4834	6.26179	20.9679	5.14071	0.322701	16.2382	1.9576	2.68691	14.4705	1.54819	0.948457	4.8567	32.8863	45.1741	8.3342	0.985236	5.92682	14.7785	10.8352	5.08645	3.60501	9.86194	0.751788	2.26405	25.5094	4.67385	3.74057	16.9863	2.28026	1.20454	5.79002	5.74469	5.89936	9.60366	3.561	8.79507	6.05112	13.573
TCGA-06-5856	114	1	34.1912	1.85915	1.26727	3.97367	15.5902	3.32443	10.001	5.10095	7.67889	27.2318	21.7997	39.8657	9.18529	0.0996083	20.7581	1.86807	1.1572	10.3036	2.44361	11.9983	7.91449	31.5629	22.6595	12.174	1.45243	6.88165	6.56348	9.40365	5.72043	2.58957	14.9547	0.309083	2.95657	16.745	6.37462	5.27484	15.8272	2.74915	0.736009	2.19967	7.93682	7.23266	12.7627	3.20102	16.6851	9.45777	8.54349
TCGA-14-2554	532	1	21.9176	0.820531	1.16831	5.00094	13.83	3.88727	10.4068	3.43076	3.83925	29.6377	8.34922	25.4341	3.86936	0.280514	13.3253	2.94106	1.90545	12.7282	4.3766	1.09994	7.70023	35.8835	39.6542	11.7432	1.03179	5.23583	9.08262	12.2544	5.4371	1.91375	18.1964	2.14458	2.59787	35.4547	6.38448	4.58975	20.1586	2.88759	1.54931	6.01055	4.4137	1.39276	9.50272	4.42497	11.1452	0.466563	9.6171
TCGA-06-0130	394	1	29.6924	1.82175	1.00583	3.04126	9.14404	4.04152	9.78514	4.42854	5.53754	34.0283	12.1465	37.6519	2.97784	0.00468466	18.5376	2.11719	1.76852	11.9642	1.65095	4.9123	7.26818	72.7059	31.6237	14.1985	1.86876	9.49767	20.4637	8.04389	5.62212	10.0857	7.065	0.179551	0.680187	20.5775	4.82246	5.72763	14.9696	4.45263	2.2	1.28988	6.52956	4.31678	19.0573	3.2219	16.8437	0.582432	12.8722
TCGA-14-1823	543	1	17.1126	1.13329	1.28229	7.1217	11.6585	2.91605	5.16583	5.0391	3.42748	33.2944	7.21124	22.9373	4.04557	0.108043	5.89731	2.80768	0.509457	9.717	2.07033	1.62066	4.31743	21.1962	83.1744	11.4052	1.38396	4.47603	11.0307	13.6419	5.85847	2.66807	14.9785	0.150726	2.84459	33.2034	4.67716	4.20552	14.0926	3.26446	2.57738	2.72777	3.64875	1.46377	13.2792	4.69453	11.7272	0.60566	13.2037
TCGA-06-0187	828	1	25.5068	2.37459	1.13795	6.37651	21.1588	2.99601	14.8764	3.04117	6.57674	18.5868	24.1766	29.1929	6.24876	0.0045603	22.5379	1.35448	1.68899	5.61906	2.0602	2.92964	6.29969	51.3511	21.7946	9.05998	0.833405	5.65891	6.3879	4.08623	2.6967	2.85184	16.1299	0.813654	2.4285	24.4113	4.35101	2.94055	16.0672	1.86208	0.889659	1.73108	8.73468	5.815	9.65123	2.18973	12.8283	1.5037	6.37828
TCGA-76-4926	138	1	17.6862	1.35385	1.71395	4.59543	106.42	2.93975	12.222	3.1253	6.00944	29.0188	18.3921	28.2581	6.61587	1.04153	17.349	2.11745	2.91896	10.7221	2.4516	1.8802	4.94401	51.9947	46.9253	10.0914	0.876043	6.3551	6.49187	7.06463	4.21405	2.16345	16.6443	1.87186	4.22321	42.4487	5.09004	3.06517	15.7416	2.56528	0.674442	3.84942	8.2755	6.27993	12.1276	3.73496	10.8165	1.49281	10.4388
TCGA-19-1390	772	1	43.9298	4.2492	1.04388	8.52466	3.74462	4.99154	17.4733	4.93287	6.08908	39.0987	36.9403	67.5293	15.8745	0.00404929	42.3654	2.6665	3.00872	13.1989	2.11399	1.07919	5.76876	183.683	5.01872	20.9447	2.23331	10.1263	6.74157	8.83741	5.04613	1.91309	13.308	0.310399	2.51059	19.0394	7.23296	7.09466	13.4958	5.96762	0.451992	1.42886	14.6695	15.1021	20.9203	3.10333	21.1277	2.36397	11.0418
TCGA-12-5295	454	1	14.9083	0.617765	1.09574	1.91439	10.534	4.76818	9.68065	3.80038	2.84441	34.7487	7.05171	34.9947	7.77898	0.0282577	10.4631	3.0839	0.520058	13.1988	1.63679	0.739949	3.22213	73.2421	18.5907	12.0468	1.06245	9.34249	20.3812	7.22311	3.539	1.11451	10.2634	0.231548	0.897025	30.1392	4.50228	6.07892	18.6537	3.29667	0.346677	8.14313	4.48917	1.23422	10.7075	8.09965	13.9618	4.46025	15.1897
TCGA-08-0386	548	1	22.529	2.22546	2.16403	8.62345	39.6341	5.43882	22.9267	2.19634	6.65583	29.7201	36.2592	41.9821	10.363	0.524309	32.6363	1.72439	2.46898	9.29543	1.94395	1.88459	6.92062	29.7484	21.7411	13.0661	1.16403	7.36606	3.92018	4.84081	4.30917	2.05267	16.1195	0.478317	1.85578	46.0423	7.97605	4.9951	20.4302	3.10458	0.419933	3.08847	12.8565	7.83333	11.2096	2.21335	13.0341	2.60845	6.96181
TCGA-06-0221	603	1	8.79918	3.81543	5.13892	13.4676	6.72192	8.25423	15.3333	2.59581	12.3142	30.4575	33.8644	38.3566	13.8534	4.60344	29.0861	1.6577	3.93232	11.6381	3.17479	1.15222	7.44685	53.7634	9.68481	15.1649	2.1496	9.53743	3.39127	4.53805	5.93743	1.12887	13.7907	0.890029	2.0395	17.9665	6.29943	6.61208	17.4442	4.80254	0.520538	4.29905	20.3665	10.5637	16.0875	1.65443	14.2042	7.20805	5.82258
TCGA-06-5417	155	0	47.4412	1.91797	3.25084	3.39504	5.01555	2.26357	9.18961	2.95243	11.8827	38.7633	31.6757	39.5956	7.93613	0.0368807	17.8004	3.589	1.70216	9.62848	1.50368	0.665293	12.1843	35.4545	16.9297	21.5575	2.82646	11.3071	3.18738	7.99269	11.9606	0.700082	17.5008	0.219343	2.22011	59.231	7.55179	11.17	7.51785	8.28895	0.500681	2.80982	18.2073	7.08103	26.448	3.75061	20.1248	1.29584	9.2388
TCGA-14-0817	164	1	15.4224	0.851469	0.931513	6.16056	13.737	6.03848	7.60896	3.73181	3.77504	38.9305	10.5592	34.857	6.08023	0.267567	11.5976	3.42732	0.831553	15.8142	2.38693	2.3744	2.23787	38.3381	27.0146	12.5399	1.15173	6.08908	17.0393	12.2995	5.06196	1.34282	6.07947	0.959843	1.01044	28.7837	5.01071	6.95316	24.5084	3.15598	1.49909	4.03614	5.38499	2.18254	12.0017	3.61169	10.6536	2.10925	11.221
TCGA-06-0156	178	1	34.7402	1.98399	1.65567	7.04844	42.551	3.9325	7.78669	4.19831	5.87738	30.3367	15.1633	38.6586	7.54181	0.207252	15.4284	2.9866	1.82274	11.0366	2.18534	1.6462	4.74522	48.6914	22.7565	11.2342	1.26592	9.05565	12.8963	14.8637	5.4054	3.08993	11.8073	0.109565	3.20076	26.4278	6.46236	7.47742	13.9112	3.9024	1.72984	6.23284	9.16312	5.13273	13.895	4.34026	11.2889	1.72714	15.4942
TCGA-27-2528	480	1	19.9162	1.65209	1.46011	4.25168	13.8516	2.09663	15.7802	4.6589	6.70826	25.8906	19.0816	35.56	4.31317	0.0136772	22.9618	1.88351	2.52497	7.76891	2.62795	3.58942	17.0382	30.1611	28.5014	10.2115	1.24827	6.28817	15.3066	5.27581	3.67786	2.04815	13.6133	1.92211	1.8954	37.1289	7.92219	3.71604	12.8811	3.01919	0.618923	4.71651	9.0384	6.07615	11.8449	2.85351	19.1121	2.12761	9.04135
TCGA-06-0190	317	1	30.6752	1.26271	0.940976	9.36953	10.649	3.60206	14.2562	2.75245	5.13389	27.4676	25.0891	34.212	2.47628	0.086177	24.7519	1.47841	2.16867	9.47998	1.93377	4.58696	4.76272	59.9727	20.2228	10.7802	1.17213	6.61532	16.5008	5.24649	3.96322	8.69242	11.3455	1.88262	1.7212	29.6324	7.57513	4.12245	15.3228	2.58302	0.948165	2.35791	6.86198	4.94177	11.8853	1.65817	16.0206	1.00474	8.24093
TCGA-28-5216	415	0	43.565	2.00258	1.05046	3.26618	44.0118	3.29971	10.7562	4.19263	6.04809	29.2019	45.4233	40.9795	6.02092	0.0857144	20.4199	1.89681	0.569924	9.12581	2.30303	1.78562	7.56726	100.586	11.3981	10.8864	1.11542	7.19911	12.2397	6.85083	3.14435	3.92905	18.9564	0.370059	1.45066	32.1587	5.05017	4.12597	19.1986	2.74505	0.861951	3.10095	7.98182	4.89812	13.9905	2.9056	22.7499	2.01807	11.9437
TCGA-32-2616	224	1	54.6	3.51365	1.06134	6.71607	4.18877	5.54729	14.9104	2.67928	5.7287	50.2289	65.7299	81.6907	11.5566	0.017786	29.1739	2.41253	2.4662	12.1312	1.25028	1.20057	8.06767	101.541	24.7491	15.3723	1.39337	16.9157	7.16676	4.62545	5.85443	3.36682	18.2715	0.155144	1.10515	32.8592	4.28838	6.94078	24.4352	5.6452	1.36289	1.89233	7.92228	7.75767	17.5268	2.40919	21.2932	1.74339	21.4234
TCGA-06-2570	285	0	26.0613	2.99475	1.69407	11.6427	11.5705	4.88779	13.1252	3.80842	6.96513	35.6456	31.4537	40.502	9.05096	0.274994	29.2724	2.58361	3.20415	10.9616	2.28354	1.29701	6.46958	52.978	11.3698	15.0159	2.12994	9.83029	5.71722	9.27586	5.54966	1.52124	14.9	0.6695	4.15288	23.4115	7.22136	6.93552	15.3978	3.4681	1.40694	3.23711	11.4272	10.9604	17.0578	1.88158	17.3236	2.2167	8.25844
TCGA-19-1389	141	1	40.5373	1.69867	0.73391	3.87851	2.03472	2.23433	11.329	2.6738	5.27259	30.4487	20.0035	25.7427	2.78896	0.0617857	15.8121	1.51852	1.88783	9.5388	1.73249	3.18188	9.51706	43.4463	39.6713	9.30315	1.29845	6.47919	12.7656	5.09995	4.07671	15.0813	7.79676	0.170122	1.47426	28.7347	4.3293	3.31524	12.6183	2.87091	0.823251	2.06459	5.14239	2.43002	11.6412	1.82454	12.639	0.91846	7.33576
TCGA-14-1402	975	1	28.067	0.861357	1.40048	4.66836	10.0256	3.64243	4.32077	5.73226	3.00488	41.7365	14.151	44.7967	3.87098	0.493595	8.72838	4.88026	2.16921	11.3622	1.55152	2.53249	4.3465	39.0572	46.1293	9.32252	1.30116	6.34739	14.5913	18.3553	8.52795	1.75839	12.031	1.31266	1.25399	34.8777	5.18125	8.21094	15.0801	3.01557	0.901928	7.83649	4.30507	1.85866	14.0273	5.5283	10.3495	2.90677	16.2414
TCGA-14-0871	880	1	21.3065	2.50584	2.43837	8.24116	8.52746	2.22938	15.1018	8.77691	9.62951	40.8934	9.45668	17.7086	6.13074	3.52461	16.4592	1.36007	4.11911	8.82707	2.79324	1.63412	13.741	59.8974	21.1456	15.9385	1.83946	7.01157	20.3669	7.68304	5.13706	2.99171	9.68991	0.492337	1.49885	80.6488	10.5402	5.35925	5.52217	2.80227	0.0864482	4.97915	10.6851	3.89384	14.9569	1.08153	21.5676	0.619592	8.29994
TCGA-14-1034	485	1	69.7479	3.32291	1.45515	7.23621	12.3147	1.7727	15.0704	4.85164	9.19874	31.0582	42.3422	45.656	6.84566	0.367184	36.1353	2.67608	1.82544	4.08661	4.7597	3.24531	10.121	45.4061	36.2906	17.1789	1.43855	7.49716	2.05011	8.97964	7.96077	4.0768	23.7778	0.576847	1.36828	50.6649	14.6128	6.20777	31.7178	3.05471	0.473746	1.74089	13.033	7.66158	14.1455	1.06045	18.2232	1.51047	10.9915
TCGA-32-2638	224	0	20.0075	2.56706	1.23872	8.65353	22.3374	3.39398	17.4194	3.20222	6.05989	20.4633	16.8502	25.4405	4.79661	0.168475	27.3326	1.64649	3.47178	5.88908	3.31607	8.97888	8.66899	32.4993	28.7808	8.91091	1.08436	5.12627	9.91116	6.2786	3.45615	1.89836	11.8267	1.86844	2.59117	25.013	7.48805	3.75545	21.4046	2.24952	1.12701	2.57495	7.92846	5.79886	9.23777	2.25396	13.0221	1.64322	7.03399
TCGA-26-5139	48	0	25.5376	2.06119	1.51833	8.37353	21.9122	2.45976	18.6643	3.8108	5.67782	22.8825	33.1685	28.4122	3.1476	0.265841	30.1448	1.56948	2.66745	7.06619	2.3394	6.04741	8.86633	46.7477	25.4809	9.45261	1.08994	6.15917	13.8191	5.17719	3.13181	2.12858	15.7055	1.65263	2.56615	32.8957	8.31867	3.20648	12.9644	2.53384	1.06933	3.65855	8.2164	6.11323	11.3605	2.20388	14.3079	1.76523	7.69487
TCGA-06-0132	771	1	16.2967	1.0702	2.01581	2.31362	22.8174	6.71673	8.5889	2.06281	4.39315	31.8498	25.0308	49.0925	5.87699	2.82951	13.5753	2.78685	0.669831	19.0537	1.27725	0.994826	3.15678	35.246	16.8457	8.45024	0.798489	6.39454	23.7566	5.55544	7.50778	2.39864	15.3043	1.41463	1.39877	21.8884	2.83739	3.25523	15.945	2.21044	2.44673	5.45768	5.50768	3.79066	12.714	2.9509	8.3335	4.6162	10.1506
TCGA-06-5418	83	1	41.6457	2.48376	0.911672	10.2888	5.77843	3.03493	10.3978	3.36923	3.93166	23.6074	24.1034	36.8457	3.91672	0.0550003	16.001	1.83882	1.03083	7.7102	1.65821	1.57091	8.50382	60.4318	19.396	11.4643	1.23091	5.48058	4.66463	10.6524	4.03982	4.0408	14.8398	0.436143	2.52345	34.1634	5.67379	5.1176	13.6676	3.2476	1.16148	4.66814	7.98202	3.19468	11.7744	3.14262	11.0354	1.64344	10.166
TCGA-19-2620	148	1	17.112	2.19059	1.2358	9.63097	13.2741	3.76791	13.5231	2.55293	5.45569	19.3265	25.5812	19.4034	2.82534	0.157818	23.416	1.80588	1.98229	8.76737	2.46532	2.89062	5.15412	46.3586	36.7821	7.12102	0.954986	2.90056	15.1929	5.59591	3.69555	2.17945	13.9213	0.903838	1.40292	31.8942	7.53039	3.05576	13.1496	2.92679	0.506337	2.3304	8.11848	7.60882	9.46779	2.3558	8.1486	1.31349	5.37319
TCGA-02-2486	493	0	37.6487	1.84846	0.8676	9.04636	4.16934	3.99569	8.80097	6.47928	5.38571	28.6225	34.3522	31.8816	4.43373	0	12.6717	2.648	1.08323	13.0656	1.85038	1.2836	7.72022	87.2739	31.6488	13.5276	1.18281	6.08044	15.2293	10.7583	3.23113	6.81492	9.98616	1.18283	2.27891	39.5231	5.3375	3.2673	19.6399	2.79996	1.89528	8.444	5.60515	1.69582	11.8824	3.25093	15.086	0.30355	14.1359
TCGA-16-0846	119	1	7.04899	1.37159	1.21808	4.96731	58.8458	5.30719	15.4301	3.45326	5.26634	37.0746	27.1215	24.2714	7.2947	0.835332	20.3458	1.98106	1.18774	11.9573	2.0318	0.933401	5.99358	25.788	18.2027	11.453	1.26889	7.14305	11.6926	6.00875	4.55528	1.69429	9.02208	0.853405	2.88853	32.0002	6.15261	4.00546	20.578	4.00048	0.788482	6.12371	7.56999	7.43009	14.9528	1.47215	17.9157	2.32697	6.9404
TCGA-19-2619	294	0	21.6402	1.80187	1.5514	8.92275	6.24658	3.04153	11.5175	2.54596	8.72686	19.8854	36.311	32.1055	5.7349	0.208331	29.27	1.16201	1.03858	6.63326	2.01773	6.01881	6.06091	64.7889	14.4551	5.94287	1.35957	5.74265	4.59325	4.41629	2.93459	1.53994	18.2452	2.60552	1.97622	29.1229	6.03165	5.93025	12.6035	2.46888	0.217259	1.37167	12.5032	8.57513	8.58515	1.95362	10.9646	2.15497	4.71143
TCGA-06-0744	595	0	7.34132	2.25618	1.13444	20.3078	16.6551	4.65368	12.5453	2.67296	5.13041	26.4212	14.7344	14.7033	5.82246	0.332847	27.5491	2.20027	1.6074	9.6113	3.00667	3.96073	5.15083	57.293	13.541	9.3346	1.13119	5.99301	5.48307	10.6083	2.34811	0.913141	9.39136	0.37615	1.37905	17.8703	11.2766	4.42563	18.407	2.99594	0.363819	1.6377	10.7549	4.48896	9.93068	2.17468	14.833	1.52108	6.89798
TCGA-06-2561	282	0	20.3366	2.11555	1.99149	4.55847	6.66196	3.8701	13.9563	2.4627	6.1572	28.0627	12.9972	19.9123	4.71712	0.558319	23.4437	1.87846	2.80191	8.48131	1.24223	1.35725	9.48481	31.6752	22.9446	9.31509	1.28854	6.75617	5.39704	7.11836	5.74894	2.66606	14.0288	1.59992	3.22575	29.6392	4.08215	3.63649	11.2413	2.06795	1.01271	2.7479	7.67325	6.18194	11.4659	5.2353	15.0383	1.83338	8.82306
TCGA-28-1753	37	0	17.9297	2.31283	1.44911	7.10895	26.9756	3.15747	17.0468	3.90528	6.34143	26.2445	17.9495	27.549	5.10362	0.0403603	32.4699	1.84032	2.16264	7.47284	2.96956	8.86593	6.13245	47.0222	15.276	8.788	1.15662	6.24574	13.2548	5.35461	3.51721	2.51122	10.2547	0.506747	1.48778	20.0814	6.19194	4.22483	14.3317	3.23717	0.903053	2.21179	10.5251	8.93047	12.0249	2.48596	12.2221	1.99989	5.71347
TCGA-06-0174	98	1	26.9535	1.80822	1.78705	7.11726	10.789	3.976	13.4183	4.01045	6.4445	26.627	22.33	46.2639	7.59198	0.783897	24.062	1.57597	2.16598	7.06696	3.35054	1.77515	4.62105	82.0051	7.31704	9.90866	1.0022	6.15565	6.43848	5.76646	5.03234	2.83112	13.0371	0.393192	1.86743	32.2876	7.14188	4.4818	17.751	3.15969	0.593594	4.27943	9.69038	7.79764	11.0045	1.76746	17.4417	1.57413	7.29488
TCGA-02-2483	466	0	24.6343	1.58321	1.27957	8.53422	6.80485	4.75294	11.2533	4.09501	8.06605	57.8914	27.7	37.1319	5.09457	0.158765	17.9003	2.67394	0.625648	11.8204	2.9448	1.81125	8.71273	146.452	11.0658	15.0216	1.99232	9.09119	10.3587	6.07696	5.22215	0.863582	14.1668	0.701272	1.07007	32.108	5.0524	8.50199	13.9313	4.42984	2.07972	2.53531	11.5716	7.57565	13.5152	4.12622	16.2144	1.67125	79.8589
TCGA-19-1787	385	1	21.8976	2.73653	1.60898	13.1051	4.27078	6.99554	13.0781	4.33381	6.73917	47.5072	33.2845	45.6556	11.272	0.0168947	13.4465	2.50269	1.00304	14.7547	2.10605	3.49495	5.99363	30.6031	16.9703	18.3509	1.4995	11.8788	8.72561	4.16012	5.31076	4.22033	6.633	0.217704	0.502792	22.6235	4.75536	7.07398	35.9659	6.86953	0.581887	1.26457	10.1713	10.4666	14.3503	2.82958	20.6897	0.487066	12.9611
TCGA-28-2509	145	0	54.6999	2.33062	0.748578	7.58712	8.32784	5.55192	13.9814	3.2764	6.14013	38.3139	51.9885	65.8994	11.7599	0.0575153	23.7226	2.58677	2.22168	9.84286	2.35847	1.89097	7.46959	84.9313	24.347	14.4469	1.11766	7.96504	4.14227	6.28556	5.81771	5.76721	21.1111	0.918508	1.51501	37.9043	5.19942	7.08198	17.9283	4.26775	0.448243	1.8322	8.393	4.7771	14.9823	2.44213	15.4105	1.23497	20.7739
TCGA-26-5135	270	1	13.1549	1.94996	1.16874	9.82501	15.3843	5.06812	16.3059	3.35514	5.23465	23.3777	25.4741	31.5733	6.90211	0.161858	29.721	0.993165	0.717818	8.63075	1.84857	4.22792	5.94147	62.5609	4.64177	8.40577	1.00131	8.86212	11.5555	5.95453	2.88074	2.00721	12.5032	0.73683	1.00016	18.4787	5.67114	2.91726	16.9191	2.08784	0.560639	3.99031	7.52184	7.78597	8.09267	1.86663	12.6195	2.75442	8.91645
TCGA-19-5960	165	0	8.38182	2.56424	2.58976	5.03364	37.1166	2.47233	18.3998	5.68666	11.4051	21.9998	14.1776	19.9565	8.24081	0.675167	21.8184	1.90402	0.849689	5.77188	3.97772	12.3111	11.8668	21.5628	26.2856	11.9559	1.47784	4.54421	4.30274	7.80073	5.77412	0.972939	13.8573	0.520986	1.49007	39.2811	7.68645	4.25708	16.15	3.97869	0.468098	1.98424	17.5227	13.7959	11.6323	2.27304	13.6346	2.04773	6.55477
TCGA-32-1982	142	1	17.9996	1.57622	1.18242	6.3633	16.8747	4.1135	10.9885	3.31251	5.01669	24.0568	23.5623	34.6973	3.92922	0.362694	18.3901	2.55078	2.94366	11.2201	2.23004	3.75676	3.01328	24.6235	31.0616	10.4371	1.32091	5.91642	16.2696	10.0772	4.09989	1.10157	13.9208	1.45723	2.61017	28.2578	7.05192	5.27813	20.0718	3.01173	1.19631	3.06382	7.34052	4.87568	11.147	3.95463	8.84922	3.76428	7.91212
TCGA-76-4931	279	1	19.808	2.76936	1.60192	12.5434	44.0304	3.84526	15.3165	4.1349	6.56923	24.429	23.9216	32.3402	8.43945	0.415349	28.5531	1.3865	2.72622	7.8057	2.69578	5.42642	7.24663	77.2041	16.0142	9.36375	1.13506	7.57803	3.61278	7.86098	3.19701	1.74971	14.7689	2.5086	2.12259	29.2742	7.86633	3.96858	16.5789	2.25272	0.318873	3.06831	9.85819	8.17933	9.08125	2.45354	15.2876	2.77631	6.54956
TCGA-32-5222	165	0	34.5721	0.64323	1.57697	4.3776	13.3009	2.93944	8.20238	4.43245	4.2609	28.6487	12.4233	30.9245	3.69503	0.112513	13.0949	3.24291	1.02177	9.69569	2.80434	7.21402	8.37637	32.048	17.3639	10.9992	1.13551	6.05108	12.6078	10.455	5.98672	1.48097	14.7033	0.881192	1.09171	41.4209	4.38827	6.61483	19.1004	3.33875	0.880006	6.47216	6.97487	2.5178	10.1485	4.8975	14.4536	1.45666	11.0696
TCGA-06-0152	375	1	16.4357	3.19308	1.43223	8.26882	7.40628	4.11888	20.0382	4.14901	6.46154	24.416	33.5085	28.9648	5.67237	0.661304	35.3102	1.39575	2.21332	7.12188	2.46738	8.05155	10.9025	76.8082	13.7463	10.3774	1.22177	7.82881	4.85359	4.90559	3.40922	1.45961	11.1461	1.65837	2.92649	24.9363	6.55893	3.94438	15.6127	2.66187	0.942101	3.12767	10.0204	6.7427	11.1842	1.99551	14.8263	1.11519	6.15031
TCGA-28-5208	474	0	14.7295	1.30324	1.68501	4.25672	15.8993	2.46312	13.6553	5.66187	5.79539	35.3238	9.64963	27.5275	4.12381	0.158788	25.5187	2.6004	1.84286	10.6962	4.49794	14.8866	8.41729	51.0697	19.0515	11.5542	1.32902	6.80319	28.2148	6.74642	6.40815	1.57221	12.8576	1.41073	1.34051	34.2811	7.93084	5.19579	21.9646	2.96641	0.904847	5.50641	8.91371	4.47113	12.7696	2.47401	17.505	1.08882	8.9545
TCGA-28-5213	298	0	28.6471	0.668187	1.27296	2.81969	38.9899	4.89667	5.30018	3.8439	2.5821	42.8324	11.4843	35.5886	4.53579	0.0713162	10.0947	3.50044	0.724967	18.7633	1.83341	1.09084	4.03331	26.7521	50.3496	14.2177	1.34136	6.1283	18.1029	17.8049	6.9505	2.93312	11.4984	1.23877	2.22347	38.1063	4.02642	6.12385	22.0582	3.49582	2.13099	5.03846	3.13933	2.26201	13.1258	6.68645	10.7433	2.22123	14.861
TCGA-06-0743	679	0	10.0386	2.20521	1.39148	10.4698	34.717	5.62231	14.5416	3.11852	3.66658	23.9835	9.26614	19.0491	4.23524	0.0959288	24.1024	1.78399	2.22878	10.6988	2.79626	2.47847	7.98318	26.3536	16.1601	8.44282	1.23158	5.96591	3.48867	12.427	1.76151	3.46993	9.95061	1.77496	2.01356	24.9737	11.105	3.18207	24.7762	2.32881	0.684914	3.64144	7.30933	5.54873	9.30818	3.7413	13.7709	4.95213	11.1267
TCGA-27-2524	231	1	28.1425	0.938541	0.656632	8.59822	9.70119	5.40634	12.9869	4.58313	3.31174	45.3205	22.5457	50.0031	3.00712	0.144247	19.8352	2.40053	0.228196	13.6859	2.98404	4.85641	2.44163	200.381	12.2435	10.4064	0.998846	10.9247	16.7905	5.73974	3.7134	5.30244	6.85378	1.77025	0.75961	23.0892	6.31319	4.61132	20.8167	2.65154	1.19671	6.27984	4.06431	1.70009	10.9763	2.29545	13.0702	0.918971	17.8388
TCGA-06-5408	357	1	29.2507	2.03427	1.56364	8.62095	17.59	3.6381	15.9785	5.95839	8.75274	25.4615	22.594	32.1341	5.87214	0.338864	29.2364	1.90194	3.27462	8.75582	3.42313	11.2835	7.3654	68.176	45.4445	12.5821	1.28794	6.46481	3.90481	5.45146	3.73947	1.80223	16.137	1.60343	3.70679	29.515	6.60305	3.77195	17.1294	2.55517	0.424903	7.00084	12.4772	8.30128	12.3449	3.88163	17.751	2.78154	9.67207
TCGA-06-2565	207	0	19.2933	3.20508	2.81753	11.4752	12.6972	2.72417	15.7148	4.92506	8.09765	21.396	16.9931	22.0056	2.27249	0.0621396	32.2726	2.2047	8.10659	5.50782	4.16015	13.862	12.0217	17.9826	26.8177	9.28375	1.27633	4.57692	2.79259	9.07032	3.90113	0.72084	17.255	2.6867	3.67058	29.9065	10.3951	4.33229	19.1687	2.90131	1.1962	1.11533	15.5821	8.93928	10.444	2.44304	18.1163	2.08737	5.90685
TCGA-06-5413	268	0	21.0496	1.06614	2.22223	4.94078	36.6455	3.35382	7.98998	5.00187	4.59018	39.8912	9.89859	35.2163	7.46065	0.0478445	16.1232	2.87068	0.666243	12.8377	2.91483	2.56643	6.3844	46.4888	33.426	13.9722	1.50714	8.25437	11.3432	11.5168	7.0122	1.98841	12.491	0.781792	1.14145	32.7312	4.86996	7.64897	13.902	4.67136	1.80204	5.51129	5.97897	5.72563	13.9853	5.04798	17.0231	1.24611	13.0749
TCGA-32-2632	269	1	15.419	0.884259	0.84181	6.14495	17.4922	5.53149	16.1595	3.1668	6.12216	29.2519	23.0553	35.0218	7.41269	0.179969	21.4158	1.84894	0.402878	15.9019	2.21628	5.64934	3.77701	21.3325	26.2344	10.1566	1.20832	5.48994	8.97276	5.25729	6.83973	5.43277	8.02669	1.12981	1.10681	20.8032	4.48037	6.45635	24.3686	2.89896	1.03057	1.18938	8.6402	5.60431	11.4973	5.17826	12.1423	1.27909	5.72672
TCGA-06-0138	737	1	19.9019	0.85731	1.09374	4.58897	36.123	4.80137	5.97872	3.62728	3.49298	28.758	12.8085	34.6765	6.33783	0.395099	9.1088	2.82715	1.53493	10.6833	1.50811	1.22952	3.24068	35.4879	15.5081	8.83002	1.54155	6.22985	11.093	15.1777	4.79753	1.89309	13.3102	0.68867	2.07074	31.2146	5.68069	5.51441	12.4987	3.88046	1.53744	6.52082	5.15597	3.54309	11.9662	4.16627	10.4242	2.97145	11.9684
TCGA-06-2559	150	1	37.3735	3.52973	1.94312	10.9076	11.2597	1.65011	8.5099	4.41716	6.29306	23.8943	63.4456	36.6284	4.91592	0.36709	16.001	2.0601	1.17195	6.43877	2.66405	5.58748	8.47249	33.5821	16.0106	11.8945	2.32553	5.32363	8.8904	10.1484	6.05855	4.56807	19.1118	0.346544	2.86598	27.8378	6.78555	8.89536	13.2827	2.50121	0.553724	3.26638	12.2735	9.73784	11.4725	1.85833	18.8594	1.70085	6.86949
TCGA-06-5412	138	1	28.2692	1.24796	0.855792	2.98641	5.04366	3.82547	10.0334	2.91405	3.49547	32.6106	14.9086	37.8367	2.86318	0.205036	16.6715	1.93051	0.626231	13.5409	1.54541	2.05564	6.72257	42.5206	15.3314	10.5849	1.17516	6.14053	20.1654	6.48009	4.86049	3.91684	12.0485	2.40498	0.997731	26.9114	3.91869	3.95867	16.2831	3.48106	2.53007	2.68344	3.92567	3.31424	11.9317	3.43491	12.5888	1.79334	10.734
TCGA-06-0686	286	0	22.9205	1.48659	0.916335	9.10318	16.9032	7.97562	11.4464	2.7219	4.32836	34.6247	35.122	41.2415	9.73074	0.481541	20.5158	1.68755	0.671555	13.5711	1.47136	1.46831	3.65161	150.454	5.78057	13.1032	1.43202	9.84691	6.68532	7.59943	3.45303	2.6559	12.2185	0.840078	1.50691	23.3622	5.50251	4.78527	17.9384	3.40376	0.842579	5.40652	8.59111	5.28732	13.1885	2.69591	9.43838	2.34269	9.7508
TCGA-12-0619	1062	1	21.5925	3.84698	1.08157	16.626	12.0523	4.64675	14.0126	2.88941	7.8413	25.3739	20.8237	29.3787	5.44322	0.378088	21.748	1.39729	1.80278	9.05916	2.1378	2.47035	6.75417	68.6906	31.0489	10.1357	1.42672	7.7154	6.27379	4.89849	3.98555	6.45757	11.2596	0.228122	3.97677	25.5516	5.13088	4.40132	20.3672	3.06002	0.76455	2.62566	11.1581	6.92318	9.90194	1.28396	12.4467	1.81422	6.25201
TCGA-16-1045	883	1	30.0733	1.84454	1.9577	5.99236	23.8789	3.02863	10.6647	2.60041	6.14242	23.8335	14.8895	35.1785	4.35434	0.0928097	22.0586	1.85966	2.76502	8.70605	1.85938	3.44629	5.92693	26.2723	48.8381	10.79	1.34884	7.0544	17.558	7.07518	4.44114	3.13811	14.9295	1.49493	7.11961	22.9075	5.49469	3.34092	15.6319	2.73675	1.44662	3.4269	7.85896	6.23888	11.1779	4.15968	11.7696	3.22961	8.73363
TCGA-32-2634	270	0	22.289	2.09363	1.92661	14.4959	12.3604	4.74505	15.1256	3.88004	8.13059	31.4204	25.4102	31.6504	9.70174	0.715975	19.8086	2.40153	1.97019	9.12443	3.42749	1.56348	10.3346	95.2854	14.5494	10.6283	1.13211	6.89028	13.8659	6.30476	4.52858	1.96881	11.0689	1.12941	1.4823	30.7643	7.32857	6.41837	14.5494	4.93987	0.681281	5.02158	12.8997	9.66973	14.3863	3.12764	15.485	6.20763	7.89501
TCGA-06-0644	375	0	70.1822	0.932652	1.24042	1.29694	14.2096	2.80952	11.1866	2.89641	4.70659	34.1759	19.5371	42.4875	3.32192	2.16395	25.6976	1.53758	1.52215	9.98449	1.23729	14.5587	5.56708	227.638	34.4995	10.7344	0.933104	8.15309	7.51537	5.34499	4.80026	17.6748	9.63326	0.320227	0.866503	31.6095	2.98219	3.76266	15.9694	2.69485	1.12165	2.70252	4.16228	4.53369	13.9253	2.91691	17.9483	1.31727	10.8028
TCGA-14-0790	419	1	13.3855	1.58048	1.7205	8.15173	23.733	2.39913	17.7991	4.27318	5.42899	30.7705	10.3544	22.1246	5.27518	0.0957017	22.3362	1.94669	2.8756	8.97548	4.5234	25.3506	7.31822	13.8278	19.8044	8.11661	1.20449	6.13299	16.1071	6.75198	3.40406	0.789375	14.907	1.59007	4.11498	45.3339	10.7383	3.72727	26.6773	2.55669	0.226848	2.17457	8.63865	5.48625	11.6127	3.48305	13.988	2.03233	6.45722
TCGA-06-0238	405	1	14.0563	1.22964	1.03314	6.72126	14.3062	4.17683	6.3864	4.48468	3.54963	42.4772	8.9901	28.6395	5.50179	1.26688	14.6985	2.73809	1.16332	12.5085	1.62925	0.614336	5.49646	57.1285	6.55379	10.9739	1.4088	8.01716	13.2813	12.2311	5.58125	1.62342	8.42957	0.655465	1.26872	22.7371	5.87692	5.21318	15.3139	3.71521	1.46656	7.29836	6.53214	5.45714	14.2987	2.65127	14.7525	1.81379	8.12363
TCGA-06-2557	33	1	14.0607	2.61016	1.19005	10.8082	17.073	4.11207	15.4059	4.01629	8.39991	22.3368	11.466	23.9619	7.99285	0.268055	22.7048	1.60414	2.13154	8.44034	2.83943	23.1597	9.43639	40.8539	23.3787	10.2104	1.39073	6.04829	24.8874	6.76206	3.76615	0.935549	12.4791	0.399259	2.98146	26.6111	6.39257	4.54097	17.0719	2.32864	2.0495	2.05872	13.7459	5.33	11.4325	3.44375	11.5321	3.79495	5.67348
TCGA-14-1829	218	0	29.9969	0.379233	1.12845	1.70885	34.7502	2.45519	2.20072	3.98489	1.97112	41.9607	5.27598	37.5516	3.11083	0.0770598	2.96647	5.12474	1.4739	12.6745	1.66121	0.454821	1.16626	15.8849	59.7107	11.1554	1.34483	3.95227	13.0761	24.9739	8.50389	1.77042	10.8383	1.04028	2.17916	31.9603	4.08692	8.57349	12.9147	4.67449	2.27494	6.98923	2.21744	0.938276	14.8682	8.18867	8.87685	1.79513	13.846
TCGA-06-0184	1228	0	24.2801	1.52604	0.817875	5.21015	9.80748	6.11393	10.4223	2.73788	4.63098	31.8935	19.0761	38.9099	6.59961	0.45644	16.4377	2.07306	1.32635	14.352	1.47135	0.781921	3.02076	36.0447	23.8379	10.2651	1.0115	5.21891	22.8102	4.85349	5.31594	2.13684	10.0817	0.727282	1.57151	25.7982	5.26741	3.83424	23.0799	2.75912	1.37271	1.61929	6.3319	3.14931	12.2032	1.83812	9.8795	3.4819	9.82893
TCGA-76-4925	146	1	35.0201	3.02546	1.43249	7.73159	3.21937	2.60748	19.5343	4.18343	5.74207	27.0858	52.4036	41.078	7.39877	0.0346267	31.542	1.75833	2.12534	9.24597	1.67323	3.80825	17.0656	42.0043	12.6727	12.4746	1.20211	8.88173	10.502	6.71852	3.30494	1.45254	15.4721	0.274584	2.89027	46.0117	4.5233	4.87224	8.01989	3.09578	0.491361	4.05229	10.6029	7.99146	11.7622	3.2471	15.5195	0.776434	10.6921
TCGA-06-0168	598	1	12.762	0.688382	0.95561	5.3854	19.3082	7.37504	12.5437	3.73089	6.37857	28.6236	24.7066	31.3149	6.53794	0.674503	19.241	1.56723	1.44308	13.5012	1.82824	1.73972	5.10777	36.5248	23.1468	8.46994	0.859753	8.12464	15.5785	3.77345	2.76878	2.97983	10.6078	1.39741	2.58111	23.5563	4.06182	3.01929	15.8998	2.43953	0.916602	3.36254	8.48062	3.29551	10.248	2.10236	9.26151	0.952574	7.23055
TCGA-19-2629	737	1	11.6217	1.11217	1.63462	4.57418	8.76132	5.13456	27.2413	3.2388	7.3026	30.1047	12.3759	20.2428	5.58089	0.159885	32.4903	1.98545	0.942392	11.981	0.88041	0.737327	5.23756	58.6473	19.8059	10.5305	0.887579	6.497	9.19724	4.80879	5.89177	2.77998	12.5224	0.327531	2.21511	39.2043	6.52035	3.52209	15.6175	2.75679	1.00891	1.38908	8.90206	8.9329	11.147	6.73435	17.1514	2.17507	7.89569
TCGA-06-5414	273	0	16.3308	3.20373	1.22425	6.59408	5.03718	3.40282	16.7485	3.47879	5.29151	23.8334	22.8603	25.5146	2.8144	0	29.0069	1.81882	2.37073	6.93704	3.40849	3.60819	11.3067	51.9594	26.3096	10.9213	1.11297	5.63809	15.9523	5.07336	3.2543	1.88307	13.8366	2.47425	1.87727	32.7881	7.2422	4.05618	17.3456	3.68016	0.719025	4.94292	7.97604	4.78991	10.683	2.65998	14.533	1.00436	7.86437
TCGA-41-2571	26	1	22.7865	2.05322	0.812963	16.7279	8.52135	6.04316	16.2285	3.04059	4.89384	25.2536	31.8122	51.5352	10.6447	0.786869	25.8131	1.18402	0.480334	10.3027	1.57537	2.62893	3.21599	109.331	4.94679	7.7642	0.85202	9.20736	7.5795	8.13527	3.80511	2.75193	14.8572	0.346652	0.943749	17.606	7.76573	3.82017	24.6051	2.87447	0.764367	5.62358	8.34337	9.4526	8.06951	4.2651	7.56248	4.74535	9.35848
TCGA-27-2523	489	1	18.8265	1.67797	1.08951	6.63999	4.29581	2.21084	12.9482	3.8183	5.34557	51.6038	18.7724	34.7488	9.52422	0.057565	35.2932	1.8006	2.09278	7.17743	3.91555	4.00533	8.88987	74.4931	8.19449	19.337	1.13389	6.91094	3.2295	6.27767	3.63442	0.962635	13.5489	0.31519	1.12727	25.868	9.97535	4.48777	15.8382	3.0475	0.566474	5.5838	11.371	7.95943	10.2164	3.17709	14.9193	2.0152	6.74881
TCGA-76-4929	111	1	31.3176	1.58353	2.30168	5.42078	6.77407	7.09669	11.9861	4.03358	7.90111	28.8595	23.2686	29.1316	14.5714	0.0298168	15.4271	1.74599	2.3873	12.8761	1.1691	0.578352	7.66849	54.5704	45.2234	10.5267	0.953753	8.71438	9.22185	7.57332	4.96169	2.41595	14.9277	0.42691	2.80773	37.5298	3.19805	3.63904	14.4871	1.99506	0.444763	5.84518	9.32177	10.2166	11.1971	4.8297	10.352	1.44163	12.1116
TCGA-19-2625	124	1	17.5068	2.44775	0.645454	11.8978	48.5045	3.58069	13.1865	3.99647	7.11071	23.1434	25.6808	25.3305	6.39813	0.252674	21.7604	1.39846	1.94253	9.46571	1.69272	2.15969	5.23709	39.3813	13.7621	7.47054	0.789554	5.90023	9.77158	5.15594	2.79496	2.86994	12.844	0.147811	5.01125	20.2534	6.37543	3.02168	17.7108	2.2741	0.233264	1.5613	11.2887	5.16879	7.16833	2.83145	9.43411	2.8287	9.82516
TCGA-06-2567	133	1	14.9521	2.17386	1.04915	8.24622	53.816	3.37546	18.299	2.61573	6.5075	24.2826	16.5297	38.7006	9.10657	0.363638	20.8578	1.99006	2.25036	10.0534	2.57245	1.09832	5.67244	23.1683	21.4354	12.6232	1.04067	7.13103	7.69216	6.46499	4.06356	1.90144	12.0155	0.423384	4.04068	38.1371	6.16185	4.06427	21.2483	2.28012	1.51059	1.86316	9.93966	7.07738	10.9442	2.16945	12.0895	2.89389	6.65351
TCGA-12-3650	333	1	10.5994	0.791405	1.70987	11.5923	10.8866	6.44723	12.5892	4.13547	4.33165	29.9966	20.8762	37.7918	8.10553	0.274438	22.6511	2.5203	0.984966	9.71645	2.91269	2.85106	2.22783	78.2021	9.14422	8.66998	0.835373	6.01914	7.47817	9.31827	4.40134	1.34067	11.3861	0.44805	0.895354	19.481	7.33956	4.67151	27.7386	2.38189	0.478901	5.32963	8.68101	4.73495	8.63028	3.01263	10.4797	4.49409	7.05594
TCGA-27-1834	1233	1	13.7407	1.46082	1.84349	5.01312	23.9061	2.96824	13.4048	3.09987	6.35845	24.4653	8.92749	20.7739	5.30803	0.236067	20.1706	2.0708	1.79083	10.3499	1.73488	0.75865	10.4704	120.601	25.46	9.24734	1.05781	5.89188	12.3895	8.3105	4.48178	2.21226	12.1899	0.914714	2.61277	33.9688	4.38766	3.21492	18.3016	2.56813	1.27867	3.08359	8.65847	7.00405	12.927	2.72807	15.3154	1.30507	12.194
TCGA-28-5218	157	1	32.9226	1.13764	1.24391	1.33443	25.6403	3.46229	13.5892	3.80577	8.13984	32.7481	9.78805	27.2251	5.7767	0.26034	20.1427	1.55278	6.9263	14.0988	1.96616	12.4079	7.06269	12.3554	55.9243	15.0407	1.66594	8.57521	30.4749	5.68236	5.46616	6.62611	10.2413	0.138953	0.133194	24.8654	2.92589	3.81991	8.5718	3.53886	0.835745	1.32498	7.26633	4.01507	16.5297	1.98408	10.6805	0.0541261	5.01665
TCGA-27-2526	87	1	17.7853	0.328255	0.821495	2.63633	9.04674	3.72896	4.64924	2.89465	2.31781	34.0741	19.3683	28.7144	4.81808	0.612081	9.85696	2.04028	0.732996	28.3362	1.61635	0.440977	5.74909	59.4178	28.0844	8.60744	1.4128	6.79927	4.72226	9.73811	3.33828	0.842718	14.4334	2.54242	1.19161	38.0645	3.27131	5.08955	17.1751	1.86688	0.214941	6.22028	3.91983	1.70919	9.14062	4.20169	11.0982	1.90815	11.0155
TCGA-14-1825	232	1	14.3853	1.49772	1.60041	5.62422	37.2484	3.9918	9.67874	3.57168	5.19893	28.6461	15.0865	33.8967	9.45843	0.0801696	18.578	1.881	1.5396	9.10761	2.17909	1.6048	5.00657	116.948	6.66585	7.7701	0.882222	7.93997	7.33877	9.39987	3.91238	1.32736	12.882	0.720496	1.38815	28.5085	5.88772	5.37087	17.9854	3.79619	0.612706	5.74355	9.07392	9.03607	16.4989	4.10167	14.1422	4.3625	8.45156
TCGA-06-0178	1642	0	15.1615	0.523641	0.899694	3.04905	19.373	5.86359	3.28165	5.70522	2.5597	70.6631	11.1105	59.5003	8.06967	0.196205	4.79772	5.02353	0.193846	21.7019	0.567459	0.515409	0.773624	65.5114	11.1041	12.2668	1.25215	11.0877	9.34082	20.84	11.0825	0.733063	6.31649	0.466762	0.389276	23.0086	3.23777	13.8956	14.2678	3.84708	0.947066	1.34872	3.34386	2.10502	19.3117	5.55399	8.34186	2.67674	19.6163
TCGA-06-0158	329	1	14.3133	3.07327	1.33366	15.2848	40.0166	3.98896	19.5591	3.04706	6.71616	19.3598	21.4603	22.26	4.3559	0.200452	27.0602	1.53499	3.31317	6.95321	2.94089	4.24918	8.51387	36.7259	29.316	7.99791	1.05577	5.55304	8.28154	6.87085	2.94875	2.72437	13.3058	0.805589	2.77248	29.4416	7.71458	3.27352	21.7346	2.20381	1.08604	1.85908	10.9354	6.36044	10.4163	2.25596	11.2416	1.68798	6.75715
TCGA-27-1832	300	1	25.476	1.591	0.796515	12.7466	22.2084	4.70615	12.1957	4.56626	5.30005	34.7071	13.6355	24.7116	6.30548	0.137352	15.4592	1.686	1.7497	14.8763	2.11441	1.00755	7.03196	24.3843	44.3009	9.21864	1.28138	8.69302	13.6288	8.05457	4.6272	8.10491	10.9206	1.88681	7.72112	31.3681	6.24819	3.17181	17.0133	2.87777	0.950114	1.82474	5.89615	2.49713	11	2.48293	9.43396	3.28484	12.8376
TCGA-06-5416	204	0	29.6746	2.481	1.51238	3.10087	14.3168	6.49918	9.93444	5.12524	5.21929	50.5404	40.6492	60.8047	20.4781	0.0778737	26.0546	6.51309	0.46937	15.3427	2.03707	2.78482	6.70071	80.9179	5.61653	24.8285	2.49482	11.0843	12.5402	7.7892	14.0838	5.25965	9.82473	0.299406	0.699097	35.8327	5.01413	12.5618	12.5176	6.25511	0.320361	8.81901	9.27751	6.73822	23.0339	9.13665	24.233	0.867412	31.2568
TCGA-19-0957	666	1	27.7506	2.74162	1.71553	5.08484	12.8237	3.71148	13.6282	2.92805	7.15772	26.5242	42.6399	38.0259	4.63251	0.494284	20.9388	1.91523	1.88479	12.1961	2.1529	1.3338	9.63272	33.45	15.7266	9.40148	1.2189	5.17345	10.3127	4.12	5.06759	2.59863	13.7462	2.30564	2.35335	27.0606	5.81485	3.53053	13.048	3.20917	0.906396	2.09859	9.42702	9.02777	13.7403	2.05761	12.2831	1.16131	7.05596
TCGA-14-0736	460	1	28.6132	0.507465	1.72192	2.68513	38.8982	7.4854	3.22915	3.92969	2.28964	46.1844	16.5097	53.78	6.33259	1.89004	4.90826	4.30974	0.373572	24.0838	0.897453	0.881799	1.23028	22.5209	57.0494	8.54122	0.954426	5.69959	16.8095	14.4586	8.02291	3.78443	9.75158	2.46494	0.889793	28.9478	2.93303	5.24489	18.4937	2.27129	1.69969	8.70278	2.41088	1.1112	12.7462	8.09201	8.73426	5.14586	23.1171
TCGA-28-5204	454	1	14.9307	1.41227	1.48915	6.31133	8.13623	3.08389	14.1415	4.44185	5.63223	30.7151	12.5607	37.3332	8.11834	0.125684	23.7621	2.03173	0.743221	8.24801	3.11719	7.14204	8.30176	48.2681	17.8776	12.0429	1.32039	8.22337	14.8661	6.60803	3.91772	0.757026	14.494	1.54609	2.34103	29.5099	6.00814	4.82624	20.2011	3.23445	0.777778	7.19777	10.2297	3.93829	12.155	3.71992	21.0607	0.766493	6.25654
TCGA-06-5859	139	0	14.9829	0.869663	1.80316	1.84776	15.8132	3.64381	12.8406	7.62356	6.91209	29.9704	5.32913	23.7226	5.44129	0.104377	17.2081	2.37035	0.984343	13.9012	2.53982	0.707824	8.01357	17.7417	48.0487	10.8837	1.33321	7.25024	9.86447	6.012	4.79286	2.56555	13.6519	0.196311	2.16137	39.0293	6.23885	4.84103	9.3329	2.90651	0.746846	2.24291	8.01416	3.25845	11.3099	4.80649	17.9718	1.62754	7.4481
TCGA-76-4927	535	1	16.9815	1.32939	1.01879	5.25303	17.8439	3.26238	17.3386	4.50925	5.16567	31.3839	23.654	27.2504	6.53064	0.0422459	30.7941	1.72137	1.73649	11.4907	2.1184	3.96198	5.69265	55.5334	13.0016	8.93475	0.991587	7.68096	12.2774	5.20373	3.19943	2.08278	11.6483	0.800286	1.35885	27.9553	7.31822	3.41984	16.996	3.10453	1.01251	4.06559	8.2141	5.70643	11.5549	2.85677	13.2541	0.685087	8.74553
TCGA-12-1597	675	1	24.1292	1.0058	1.11346	8.0088	16.0338	4.17129	10.6413	4.42412	4.76112	29.468	32.2779	54.0356	6.25864	1.71243	13.5171	2.14834	1.2041	9.565	2.36066	1.17111	4.40502	36.6861	12.4667	8.27097	0.832594	4.39681	11.327	7.39024	5.74357	1.75935	15.5126	0.591081	1.19672	21.754	6.55585	4.31468	19.3869	2.76631	0.78113	7.58234	9.10172	4.75498	9.86326	2.85032	8.83515	3.74295	11.5474
TCGA-06-0646	175	1	14.9512	2.67519	1.61308	7.91151	20.7827	4.76581	12.9174	3.57522	5.95227	26.2399	23.0073	28.2992	6.68649	0.154755	23.7951	1.37144	1.91276	7.31128	2.15307	2.55244	5.52119	34.1275	12.9721	9.28579	1.21959	6.61396	14.2574	6.3556	4.47332	1.76461	11.1639	0.396278	2.16759	25.2126	5.97765	4.35135	23.5962	2.79611	1.17204	3.01222	9.80512	10.6729	9.18762	3.08269	12.535	2.10877	8.6191
TCGA-06-2569	13	0	57.3085	5.36578	1.42751	14.8863	4.05769	2.82701	12.9372	4.16811	12.0652	49.4763	26.4802	23.4937	5.02894	0.538698	32.7095	2.63124	10.9099	30.0264	3.17244	4.67155	8.73866	3.65529	94.6812	33.2243	4.09694	16.9972	71.6954	8.72212	8.64119	1.76713	12.5376	0.195318	0.305246	13.2361	3.03527	16.155	19.0912	8.0317	0.191759	0.598963	19.0852	5.95163	31.7451	0.939627	18.6431	0.300644	7.26482
[truncated: 92 more columns]
